1                    **miR-203b: a novel regulator of MyoD expression in**  
2                                            **tilapia skeletal muscle**

3  
4                                            **Biao Yan<sup>#</sup>, Li-Hui Zhao<sup>#</sup>, Jin-Tao Guo, Jin-Liang Zhao**

5  
6                    Key laboratory of Freshwater Aquatic Genetic Resources, Shanghai Ocean University,  
7                    Ministry of Agriculture, Shanghai Ocean University, Shanghai 201306, China

8  
9  
10  
11  
12  
13  
14  
15  
16  
17  
18  
19  
20  
21  
22

14    **Correspondence to:** Jin-liang Zhao  
15    Shanghai Ocean University, Huchenghuan Road #999, 201306, Shanghai, China  
16    Tel: 086- 21-66111430  
17    Fax: 086-21-65988326  
18    E-mail: yanbiao1982@126.com

19    <sup>#</sup>These authors contributed to this work equally.

23 **SUMMARY**

24 MyoD is one of the helix-loop-helix proteins regulating muscle-specific gene expression in  
25 tilapia. Tight regulation of MyoD protein level is necessary for the precise regulation of skeletal  
26 muscle development. MicroRNAs (miRNAs) are a class of regulatory RNAs that  
27 post-transcriptionally regulate gene expression. Increasing evidences have suggested that miRNAs  
28 play an important role in regulating skeletal muscle development. We reasoned that MyoD  
29 expression may be regulated by miRNAs. Bioinformatics prediction identify a putative miR-203b  
30 target site in the 3'-UTR of MyoD gene. Interestingly, miR-203b expression is negatively  
31 correlated is negatively correlated with MyoD expression. miR-203b suppression leads to a  
32 significant increase in MyoD expression, thereby activating MyoD downstream gene. 3'-UTR  
33 luciferase reporter assay further verifies the direct interaction between miR-203b and MyoD.  
34 Taken together, our studies reveal a novel molecular mechanism in which miRNA participates in  
35 transcriptional circuits that regulates gene expression in tilapia skeletal muscle.

36

37 Key words: Nile tilapia, MyoD, microRNA, skeletal muscle development

38

39

40

41

42

43

44

45 **Introduction**

46 Nile tilapia (*Oreochromis niloticus*) is one of the most widely cultured fish in the world. They  
47 are adaptable to a wide range of environmental conditions, and gradually become a major protein  
48 source around the world (Yan and Wang, 2010). Skeletal muscle is the major edible-part in fish.  
49 The development and growth of skeletal muscle ultimately determines fish growth performance  
50 (Johnston et al., 2011; Rescan, 2008). Thus, better understanding of the regulatory mechanism of  
51 muscle development will provide important information for both developmental biologists and  
52 fish breeding experts.

53 Skeletal muscle development is well defined process, and regulated by the sequential  
54 expression of muscle-specific myogenic regulatory transcription factors (MRFs) (Chen and Tsai,  
55 2008). MRFs belong to a group of helix-loop-helix transcription factors, including myogenin,  
56 MRF4, MyoD and Myf5. Of them, MyoD is thought as the key transcription factor that initiates  
57 the cascade of regulatory events during muscle development. MyoD can be regulated at  
58 transcriptional level through the recruitment of both chromatin remodeling complexes and  
59 p300/CBP and PCAF acetyltransferases onto MyoD promoter, whereas histone deacetylases  
60 (HDACs) recruitment inhibits MyoD expression(Aguiar et al., 2008; Francetic et al., 2012; Lassar,  
61 2012);M. PC4 (Tis7/Ifrd1) can cooperate with MyoD to induce the transcriptional activity of  
62 myocyte enhancer factor 2C (MEF2C), and repress the transcriptional activity of NF- $\kappa$ B to inhibit  
63 MyoD mRNA accumulation (Micheli et al., 2011). In addition,  $\beta$ -Catenin is found to be interacted  
64 with MyoD and regulates its transcription activity (Kim et al., 2008). Given its critical role in the  
65 regulation of muscle development, it is highly likely that MyoD expression is under additional  
66 modes of regulation yet to be discovered.

67 MicroRNAs (miRNAs) are short, non-coding RNAs that repress gene expression by binding  
68 to target mRNAs. They have emerged as crucial regulators for many developmental processes,  
69 including skeletal muscle development (Carthew, 2006; Carthew and Sontheimer, 2009). Previous  
70 studies have identified and characterized several muscle-specific miRNAs that control various  
71 aspects of myogenesis. These miRNAs include miR-1, miR-133a, miR-133b, miR-206, miR-208,  
72 miR-486 and miR-499. Aberrant regulation of some of these muscle-enriched miRNAs can disrupt  
73 intracellular signaling networks which may result in pathological conditions (Williams et al.,  
74 2009). In general, one gene can be regulated by several miRNAs, while one miRNA may inhibit  
75 the expression of multiple target genes, which results in the formation of complex regulatory  
76 feedback networks. We reasoned that MyoD expression may be regulated by miRNAs (Makeyev  
77 and Maniatis, 2008). However, miRNAs regulation of MyoD expression has never been reported  
78 despite its notable expression in skeletal muscle. The objective of this study was to examine the  
79 role of miRNAs in regulation of MyoD expression in tilapia.

## 80 **Materials and methods**

### 81 **Experimental fish and tissue sample preparation**

82 Nile tilapias were obtained from the fishery farm of Shanghai Ocean University. They were  
83 maintained in a water circulation system in 100-liter tanks, and water temperature was kept at  $26 \pm$   
84  $2^{\circ}\text{C}$  under a 12-h light/12-h dark photoperiod. Skeletal muscle samples were collected from  
85 different developmental stages including juvenile fish, adult fish, and senility fish, respectively.  
86 These tissue samples were stored in liquid nitrogen before RNA isolation.

### 87 **Prediction of MyoD-binding miRNAs**

88 To identify miRNAs that potentially bind MyoD, we queried the MicroCosm targets

89 (<http://www.ebi.ac.uk/enright-srv/microcosm/>) and TargetScan prediction program  
90 (<http://www.targetscan.org/>) based on zebrafish genome (Alexiou et al., 2011; Rajewsky, 2006;  
91 Saito and Sætrom, 2010). We compared the sequence conservation of miRNA target sites between  
92 zebrafish and tilapia using blast search.

### 93 **Real-time PCR**

94 Total RNA was extracted using Trizol reagent (Invitrogen), and miRNAs were extracted using  
95 the miRNeasy kit (Qiagen). For mRNA analysis, total RNA were reversed transcribed with  
96 SuperScript III First-Strand Synthesis System for RT-PCR (Takara), and amplified with SYBR  
97 Green PCR Master Mix (Takara). 18 SrRNA level was detected as internal normalization control.  
98 The primers used for mRNA detection were listed in table 1. For miRNA expression assays, RNA  
99 was reverse-transcribed using specific miRNA stem-loop primers. Mature miRNA expression was  
100 detected using Taqman miRNA assays (Applied Biosystems) according to the manufacturer's  
101 instructions. miRNA expression was normalized against the expression of house-keeping gene,  
102 18S rRNA, using comparative Ct method (Schmittgen and Livak, 2008).

### 103 **Luciferase assay**

104 MyoD 3'-UTR segments predicted to interact specifically with miR-203b were subcloned by  
105 standard procedures into the pGL3 vector (Promega) immediately downstream of the stop codon  
106 of the luciferase gene. The mutant MyoD 3'-UTR reporters were created by mutating the seed  
107 region of predicted miR-203b site. These reporters were transfected into HEK 293T cells, and  
108 transfection efficiency corrected by a *Renilla luciferase* vector (PRL-CMV, Promega). Luciferase  
109 activity was detected using the Luciferase Assay Systems kit (Promega) according to the  
110 manufacturer's protocol.

## 111 **Regulation of miR-203b expression level *in vivo***

112 Chemically modified antisense oligonucleotides (antagomir) and agomir were synthesized to  
113 regulate miR-203b expression (Ribobio, Guangzhou, China). The 3' end of the oligonucleotides  
114 was conjugated to cholesterol, and all the bases were 2'-OMe modified. The antagomir or agomir  
115 oligonucleotides were deprotected, desalted and purified by high-performance liquid  
116 chromatography. Tilapia weighing about 5 g received tail-vein injection of saline, agomir, or  
117 antagomir at a dose of 60 mg/kg body weight on every other day. They were sacrificed 24 h after  
118 the last injection for experimental analysis (Morton et al., 2008; Van Solingen et al., 2009).

## 119 **Statistical Analysis**

120 Values were expressed as means  $\pm$  S.E.M. unless otherwise stated. Statistical significance  
121 was assessed by one-way ANOVA followed by Bonferroni's multiple comparison tests. Statistical  
122 significance was defined as  $P < 0.05$ .

## 123 **Result**

### 124 **Prediction of miRNAs targeting MyoD**

125 Blast search suggests that the sequence of MyoD 3'-UTR is conserved between zebrafish and  
126 tilapia. To identify miRNAs that interact with MyoD protein, we employed MicroCosm and  
127 targetscan prediction program based on zebrafish genome. Bioinformatic prediction revealed that  
128 miR-375, miR-722, miR-203b, miR-142a-5p, miR-138, miR-190, miR-190b, miR-122, and  
129 miR-23b may regulate MyoD expression (Table. 2). Furthermore, these miRNAs are highly  
130 conserved between tilapia and zebrafish. Among these predicted miRNAs, miR-122, miR-375 and  
131 miR-722 have been reported to be abundantly expressed in liver, pancreas and retina (Chang et al.,  
132 2008; O'Quin et al., 2011; Poy et al., 2009). Thus, they were ruled out for further analysis. We then

133 used RT-PCR method to detect the expression pattern of other miRNAs. As shown in table 2.  
134 miR-23b, miR-190, miR-190 and miR-203b can be detected in skeletal muscle. Therefore, we  
135 speculated that these miRNAs would potentially regulate MyoD expression in tilapia skeletal  
136 muscle.

### 137 **MyoD expression is negatively associated with miR-203b expression**

138 MyoD is found to be highly expressed in juvenile fish, but hardly detected in adult fish, and  
139 then MyoD expression in senility fish is gradually increased (Fig.1A). We postulated that  
140 MyoD-inhibitory miRNAs would have an opposite expression pattern. Real-time PCR analysis  
141 demonstrated that among these potential miRNA regulators of MyoD, one interesting hit is  
142 miR-203b (Fig.1B).

143 To examine the possibility of miR-203b targeting MyoD, we asked whether alternation in  
144 miR-203b expression would change MyoD expression. The result shows that miR-203b antagomir  
145 treatment results in a significant reduction in miR-203b expression, while MyoD expression is  
146 significantly upregulated. miR-203b mismatch antagomir treatment has no effect on miR-203b  
147 expression, thereby does not affect MyoD expression (Fig.1C and D). By contrast, mimicking  
148 miR-203b with an miR-203b agomir but not control agomir results a significant reduction in  
149 MyoD expression (Fig.1 E). Taken together, these evidences suggest that miR-203b is involved in  
150 the regulation of MyoD expression *in vivo*.

### 151 **miR-203b directly targeting MyoD 3'UTR**

152 To verify that miR-203b directly inhibits MyoD expression, we employed a luciferase  
153 reporter assay. The alignment of miR-203b with MyoD 3'UTR insert is illustrated (Fig. 2A).  
154 Cotransfection of HEK 293T cells with the parental luciferase construct (PGL3, without MyoD

155 3'UTR) plus the miR-203b expression vector does not significantly change expression of the  
156 reporter (Fig. 2B). However, when the miR-203b target site from the MyoD 3'UTR is inserted into  
157 the luciferase construct, luciferase expression is strongly decreased when cotransfected with  
158 miR-203b, but the suppression is relieved by a single base mutation in the binding site (Fig.2B).  
159 These result suggest that miR-203b directly suppresses MyoD expression by binding to its 3'UTR  
160 target sequence.

### 161 **miR-203b silencing activates MyoD downstream genes**

162 MyoD is an important myogenic transcription factors that control the spatial and temporal  
163 expression of muscle-specific genes. Alternation in MyoD expression would affect the expression  
164 of MyoD downstream genes. In this study, we found that miR-203b silencing results in a  
165 significant increase in MyoD expression. MyoD downstream genes, including Myosin heavy chain  
166 (MHC), utrophin (Utrn), cell division control protein 6 (Cdc6), and Sp1 transcription factor (Sp1)  
167 genes, were significantly upregulated (Rosenberg et al., 2006; Seward et al., 2001; Viñals et al.,  
168 1997; Zhang et al., 2010). In contrast, miR-203b mismatch antagomir treatment has no effect on  
169 miR-203b expression, and does not affect the expression of MyoD and its downstream genes  
170 (Fig.3 A-D). Taken together, these results suggested that miR-203b can affect MyoD expression,  
171 thereby changing the expression of MyoD downstream genes.

### 172 **Discussion**

173 Nile tilapia is one of the most important aquaculture species widely used in aquaculture for  
174 commercial use. The central goal of tilapia aquaculture is the production of skeletal muscle. It is  
175 therefore important to understand the regulatory mechanism of muscle development at the  
176 molecular level. Muscle development is a well-defined process, which is regulated by various



177 environmental factors and distinct signaling pathways, resulting in the activation of specific  
178 transcription factors and gene expression. Gene expression in skeletal muscle is controlled by a  
179 family of basic helix-loop-helix transcription factors known as the myogenic regulatory factors,  
180 including Myf5, MyoD, myogenin and MRF4 are found to be crucial for controlling myogenesis  
181 (Chen and Tsai, 2008; Johnston, 1999; Johnston et al., 2011). MyoD has been proposed to be  
182 a“ pioneer” transcription factor required to initiate the cascade of regulatory events required to  
183 initiate expression of muscle-specific genes. MyoD recruits chromatin-modifying activities that  
184 alter both the regional histone modifications and the chromatin remodeling at promoter binding  
185 sites(Cao et al., 2006; Gerber et al., 1997; Londhe and Davie, 2011). Tight regulation of MyoD  
186 protein level is necessary for the precise regulation of skeletal muscle development. In this study,  
187 MyoD expression can be regulated at miRNA level.

188         The roles of miRNAs in muscle development have attracted much attention and research  
189 interest (Ge and Chen, 2011). miR-133a can promote myoblast proliferation through the  
190 repression of SRF expression (Liu et al., 2008). miR-206 can affect myoblast differentiation  
191 program through the indirect down-regulation of the helix-loop-helix protein Id, a repressor of  
192 MyoD (Kim et al., 2006). miR-181 inhibits the expression of Hox-A1, which results in the  
193 inhibition of MyoD expression (Yamamoto and Kuroiwa, 2003). Recently, Huang et al. (2012)  
194 investigated the phenotypic variation in the body growth of Nile tilapia and identified the  
195 differential expression of growth-related miRNA in skeletal muscle. They found that 8  
196 down-regulated miRNAs and 8 up-regulated miRNA associated with body growth in tilapia. The  
197 finding suggests that miRNA may be involved in the regulation of fish growth, and differential  
198 expression of growth-related miRNA may serve as molecular markers to guide tilapia breeding

199 programs(Huang et al., 2012). In light of these studies, it is not surprise that the regulation  
200 between myogenic transcription factors and miRNAs is very complex. The miR-203b/MyoD  
201 interaction would shed a novel insight into the understanding the molecular mechanism of muscle  
202 development.

203 As a critical inducer of skeletal myogenesis both *in vitro* and *in vivo*, it is not surprising that  
204 the myogenic production of MyoD is tightly controlled by multiple mechanisms. p300/CBP,  
205 PCAF acetyltransferases and histone deacetylases (HDACs) can be recruited onto MyoD promoter,  
206 and regulate MyoD gene expression at transcriptional level. IFRD1 can represses the  
207 transcriptional activity of NF- $\kappa$ B, and indirectly inhibit MyoD expression.  $\beta$ -catenin interacts  
208 directly with MyoD, and enhances its binding to E box elements and transcriptional activity.  
209 miR-203b, can regulates muscle development by direct targeting of MyoD (Francetic et al., 2012;  
210 Kim et al., 2008; Micheli et al., 2011). Thus, cells have numerous mechanisms to quantitatively  
211 regulate the dosage of MyoD expression. Our findings reveal that miR-203b targets the protein  
212 MyoD for repression highlights an important facet of miRNA-mediated regulation of critical  
213 cellular events. The event suggests that cells bear back-up mechanisms and regulatory pathways  
214 that titrate the dose of this crucial regulator of apoptosis in a very controlled manner (Bushati and  
215 Cohen, 2007; Kloosterman and Plasterk, 2006).

## 216 **Conclusion**

217 In summary, we reveal that MyoD is regulated by miR-203b expression in tilapia. miR-203b  
218 silencing leads to the up-regulation of MyoD expression, thereby the activation of miR-203b  
219 downstream genes. This study extends our knowledge about the regulation of MyoD expression,  
220 and would shed new light on the understanding the molecular mechanism of muscle development

221 and growth.

## 222 **Acknowledgements**

223 This work was supported by China Agriculture Research System (CARS-49-04B to J.-L.Z.)

224

225

226

## 227 **References**

228 **Aguiar, D. H., Bock, C., Padovani, C. R. and Pai-Silva, M. D.** (2008). MyoD, myogenin and  
229 proliferating cell nuclear antigen expression in growing Nile tilapia (*Oreochromis niloticus* L.). *Aquac.*  
230 *Res.* **39**, 1673-1679.

231 **Alexiou, P., Maragkakis, M. and Hatzigeorgiou, A. G.** (2011). Online resources for microRNA  
232 analysis. *J. Nucleic Acids Invest.* **2**, e4.

233 **Bushati, N. and Cohen, S. M.** (2007). microRNA functions. *Annu. Rev. Cell .Dev. Bi.* **23**, 175-205.

234 **Cao, Y., Kumar, R. M., Penn, B. H., Berkes, C. A., Kooperberg, C., Boyer, L. A., Young, R. A. and**  
235 **Tapscott, S. J.** (2006). Global and gene-specific analyses show distinct roles for Myod and Myog at a  
236 common set of promoters. *EMBO J.* **25**, 502-511.

237 **Carthew, R. W.** (2006). Gene regulation by microRNAs. *Curr. Opin. Genet Dev.* **16**, 203-208.

238 **Carthew, R. W. and Sontheimer, E. J.** (2009). Origins and mechanisms of miRNAs and siRNAs. *Cell*  
239 **136**, 642-655.

240 **Chang, J., Guo, J. T., Jiang, D., Guo, H., Taylor, J. M. and Block, T. M.** (2008). Liver-specific  
241 microRNA miR-122 enhances the replication of hepatitis C virus in nonhepatic cells. *J. Vvirol.* **82**,  
242 8215-8223.

243 **Chen, Y. and Tsai, H.** (2008). Myogenic regulatory factors Myf5 and Mrf4 of fish: current status and  
244 perspective. *J Fish Biol.* **73**, 1872-1890.

245 **Francetic, T., May, L., Hamed, M., Mach, H., Meyers, D., Cole, P. A., Chen, J. and Li, Q.** (2012).  
246 Regulation of Myf5 early enhancer by histone acetyltransferase p300 during stem cell differentiation.  
247 *Mol. Biol.* 1:1.

248 **Ge, Y. and Chen, J.** (2011). MicroRNAs in skeletal myogenesis. *Cell Cycle* **10**, 441.

249 **Gerber, A. N., Klesert, T. R., Bergstrom, D. A. and Tapscott, S. J.** (1997). Two domains of MyoD  
250 mediate transcriptional activation of genes in repressive chromatin: a mechanism for lineage  
251 determination in myogenesis. *Gene. Dev.* **11**, 436-450.

252 **Huang, C., Li, Y., Hu, S., Chi, J., Lin, G., Lin, C., Gong, H., Chen, R., Chang, S. and Liu, F.** (2012).  
253 Differential expression patterns of growth-related microRNA in the skeletal muscle of Nile tilapia  
254 (*Oreochromis niloticus*). *J. Anim. Sci.* doi: 10.2527/jas.2012-5142.

255 **Johnston, I. A.** (1999). Muscle development and growth: potential implications for flesh quality in fish.  
256 *Aquaculture* **177**, 99-115.

257 **Johnston, I. A., Bower, N. I. and Macqueen, D. J.** (2011). Growth and the regulation of myotomal  
258 muscle mass in teleost fish. *J. Exp. Biol.* **214**, 1617-1628.

259 **Kim, C. H., Neiswender, H., Baik, E. J., Xiong, W. C. and Mei, L.** (2008).  $\beta$ -Catenin interacts with  
260 MyoD and regulates its transcription activity. *Mol. Cell. Biol.* **28**, 2941-2951.

261 **Kim, H. K., Lee, Y. S., Sivaprasad, U., Malhotra, A. and Dutta, A.** (2006). Muscle-specific  
262 microRNA miR-206 promotes muscle differentiation. *J. Cell Biol.* **174**, 677-687.

263 **Kloosterman, W. P. and Plasterk, R. H. A.** (2006). The diverse functions of microRNAs in animal  
264 development and disease. *Dev. Cell* **11**, 441-450.

265 **Lassar, A.** (2012). Finding MyoD with a little help from my friends. *Nat Cell Biol.* **14**, 116-116.

266 **Liu, N., Bezprozvannaya, S., Williams, A. H., Qi, X., Richardson, J. A., Bassel-Duby, R. and**

267 **Olson, E. N.** (2008). microRNA-133a regulates cardiomyocyte proliferation and suppresses smooth

268 muscle gene expression in the heart. *Gene. Dev.* **22**, 3242-3254.

269 **Londhe, P. and Davie, J. K.** (2011). Sequential association of myogenic regulatory factors and E

270 proteins at muscle-specific genes. *Skeletal muscle* **1**, 1-18.

271 **Makeyev, E. V. and Maniatis, T.** (2008). Multilevel regulation of gene expression by microRNAs.

272 *Science's STKE* **319**, 1789.

273 **Micheli, L., Leonardi, L., Conti, F., Maresca, G., Colazingari, S., Mattei, E., Lira, S. A.,**

274 **Farioli-Vecchioli, S., Caruso, M. and Tirone, F.** (2011). PC4/Tis7/IFRD1 Stimulates Skeletal Muscle

275 Regeneration and Is Involved in Myoblast Differentiation as a Regulator of MyoD and NF- $\kappa$ B. *J. Biol.*

276 *Chem.* **286**, 5691-5707.

277 **Morton, S. U., Scherz, P. J., Cordes, K. R., Ivey, K. N., Stainier, D. Y. R. and Srivastava, D.** (2008).

278 microRNA-138 modulates cardiac patterning during embryonic development. *P. Natl. Acad. Sci. USA*

279 **105**, 17830.

280 **O'Quin, K., Smith, D., Naseer, Z., Schulte, J., Engel, S., Loh, Y. H., Streelman, J., Boore, J. and**

281 **Carleton, K.** (2011). Divergence in cis-regulatory sequences surrounding the opsin gene arrays of

282 African cichlid fishes. *BMC Evol. Biol.* **11**, 120.

283 **Poy, M. N., Hausser, J., Trajkovski, M., Braun, M., Collins, S., Rorsman, P., Zavolan, M. and**

284 **Stoffel, M.** (2009). miR-375 maintains normal pancreatic  $\alpha$ - and  $\beta$ -cell mass. *P. Natl. Acad. Sci. USA*

285 **106**, 5813.

286 **Rajewsky, N.** (2006). microRNA target predictions in animals. *Nat. Genet.* **38**, S8-S13.

287 **Rescan, P. Y.** (2008). New insights into skeletal muscle development and growth in teleost fishes. *J.*  
288 *Exp. Zool.* **310**, 541-548.

289 **Rosenberg, M. I., Georges, S. A., Asawachaicharn, A., Analau, E. and Tapscott, S. J.** (2006).  
290 MyoD inhibits Fstl1 and Utrn expression by inducing transcription of miR-206. *J. Cell Biol.* **175**,  
291 77-85.

292 **Saito, T. and Sætrom, P.** (2010). MicroRNAs–targeting and target prediction. *New Biotechnol.* **27**,  
293 243-249.

294 **Schmittgen, T. D. and Livak, K. J.** (2008). Analyzing real-time PCR data by the comparative CT  
295 method. *Nat. Protoc.* **3**, 1101-1108.

296 **Seward, D. J., Haney, J. C., Rudnicki, M. A. and Swoap, S. J.** (2001). bHLH transcription factor  
297 MyoD affects myosin heavy chain expression pattern in a muscle-specific fashion. *Am. J. Physiol.* **280**,  
298 C408-C413.

299 **Van Solingen, C., Seghers, L., Bijkerk, R., Duijs, J. M. G. J., Roeten, M. K., Van Oeveren-Rietdijk,**  
300 **A. M., Baelde, H. J., Monge, M., Vos, J. B. and De Boer, H. C.** (2009). Antagomir-mediated  
301 silencing of endothelial cell specific microRNA-126 impairs ischemia-induced angiogenesis. *J. Cell.*  
302 *Mol. Med.* **13**, 1577-1585.

303 **Vñals, F., Fandos, C., Santalucia, T., Ferré, J., Testar, X., Palacín, M. and Zorzano, A.** (1997).  
304 Myogenesis and MyoD down-regulate Sp1. *J. Biol.Chem.***272**, 12913-12921.

305 **Williams, A. H., Liu, N., Van Rooij, E. and Olson, E. N.** (2009). MicroRNA control of muscle  
306 development and disease. *Curr. Opin. Cell Biol.* **21**, 461-469.

307 **Yamamoto, M. and Kuroiwa, A.** (2003). Hoxa-11 and Hoxa-13 are involved in repression of MyoD  
308 during limb muscle development. *Dev. Growth Differ.* **45**, 485-498.

309 **Yan, B. and Wang, Z.** (2010). Growth, salinity tolerance and microsatellite analysis of the F2  
310 reciprocal hybrids of *Oreochromis niloticus* × *Sarotherodon galilaeus* at different salinities. *Aquac. Res.*  
311 **41**, e336-e344.

312 **Zhang, K., Sha, J. and Harter, M. L.** (2010). Activation of Cdc6 by MyoD is associated with the  
313 expansion of quiescent myogenic satellite cells. *J. Cell Biol.* **188**, 39-48.

314

315

316

317

318

319

320

321

322

323

324

325

326

327

328

329

330

331 **Figure Legend**

332 **Fig. 1 Identification of miR-203b as a regulator of MyoD expression**

333 (A) Total RNA sample was extracted from the skeletal muscle in different developmental stages  
334 including juvenile fish, adult fish and senility fish, respectively. The level of MyoD expression  
335 was detected using real-time PCR, and 18S rRNA was detected as the internal control. The data  
336 was expressed as the relative change compared with the expression level in juvenile fish. (B)  
337 miRNA sample was extracted from the same samples as shown in Fig. 1A. The expression of  
338 miR-23b, miR-190, miR-190 or miR-203b was detected using real-time PCR, and 18S rRNA was  
339 detected as the internal control. The data was expressed as the relative change compared with the  
340 corresponding miRNA expression of juvenile fish. (C, D) Tilapia weighing about 5 g received  
341 tail-vein injection of miR-203b antagomir or mismatch antagomir at a dose of 60 mg/kg body  
342 weight on every other day. They were sacrificed after 7 d or 14 d antagomir treatment, respectively.  
343 The expression of miR-203b or MyoD level was detected using Real-time PCR, and 18S rRNA  
344 was detected as the internal control. The data was expressed as the relative change compared with  
345 the untreated group. Four technical replicates were used for each treatment. (E) Tilapia weighing  
346 about 5 g received tail-vein injection of miR-203b agomir or mismatch agomir at a dose of 60  
347 mg/kg body weight on every other day. They were sacrificed after 7 d or 14 d agomir treatment,  
348 respectively. The expression of MyoD level was detected using Real-time PCR, and 18S rRNA  
349 was detected as the internal control. The data was expressed as the relative change compared with  
350 the untreated group. Four technical replicates were used for each treatment.

351 **Fig. 2 miR-203b directly targeting MyoD 3'UTR**

352 (A) The alignment between miR-203b and the 3'UTR segment of MyoD. (B) Luciferase assays



353 were carried out to address whether MyoD is directly targeted by miR-203b. HEK 293T cells were  
354 transfected with the plasmid as shown in Fig.2B, and transfection efficiency corrected by a *Renilla*  
355 *luciferase* vector (PRL-CMV, Promega). Luciferase activity was detected using the luciferase  
356 Assay Systems kit (Promega) according to the manufacturer's protocol. Results were expressed as  
357 means  $\pm$  S.E.M. of four independent experiments.

358 **Fig.3 miR-203b silencing activates MyoD downstream genes**

359 Tilapia was treated as shown in Fig. 1C. The expression of Sp1, MHC, cdc6 or utrn was  
360 detected using Real-time PCR, and 18S rRNA was detected as the internal control. The data was  
361 expressed as the relative change compared with the untreated group. Four technical replicates  
362 were used for each treatment.

363 Table 1: Primer sequence used for the quantification of mRNA expression

364 Table 2: Predicted MyoD-binding miRNAs and their expression pattern

365

**A**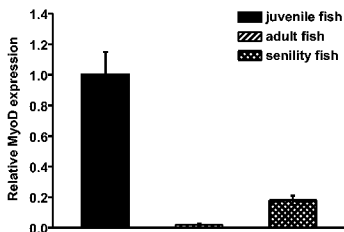**B**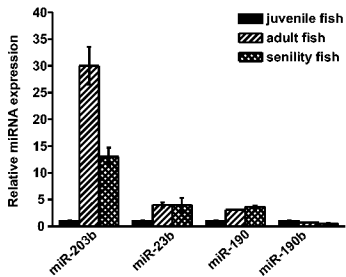**C**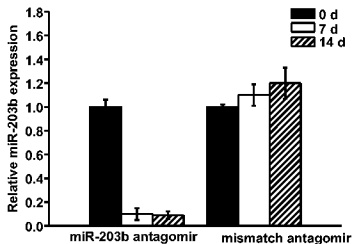**D**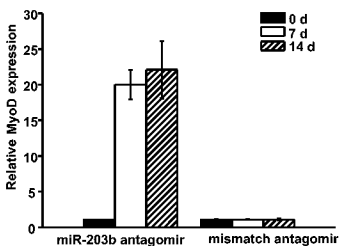**E**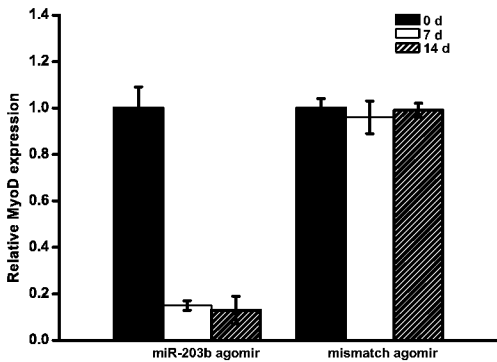

A

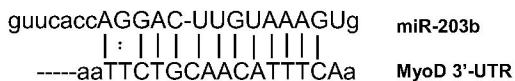

B

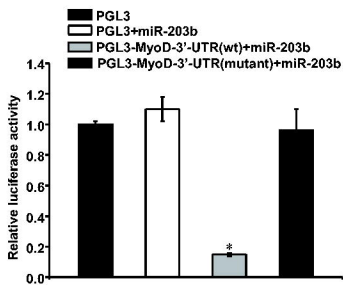

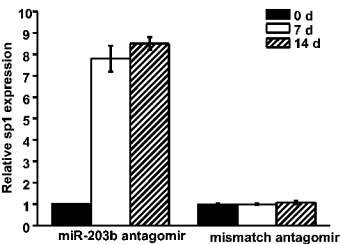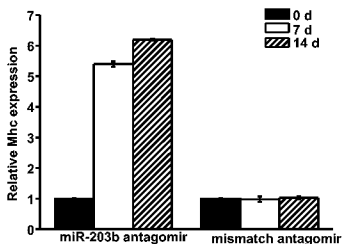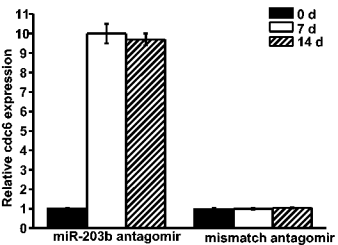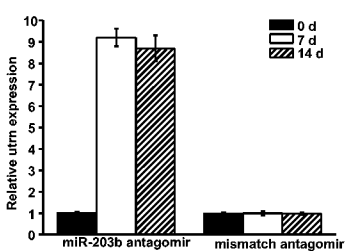

**Table 1: Primer sequence used for the detection of mRNA expression**

| <b>Gene</b> | <b>GeneBank<br/>accession</b> | <b>Annealing<br/>temperature</b> | <b>Primer</b>                                   |
|-------------|-------------------------------|----------------------------------|-------------------------------------------------|
| MHC         | AF050035                      | 58°C                             | ACAACATTAGAAATTTGCTGCGG<br>CGGGCGTACTCGATCTTGTT |
| Sp1         | XM_003451834                  | 58°C                             | CCAGGCCGGTACCGTTGCAG<br>GCAGCAGGATGGCCCCTGTG    |
| Cdc6        | XM_003454088                  | 55°C                             | GGCAACAGACGCCCCCTTCC<br>GGCGCTCAGGGATGGCAGTG    |
| Utrn        | XM_003449882                  | 56°C                             | CGGAGACGTCGCTGGGGGA<br>TGGCCGTCTCCCTGTCTTGG     |
| 18S rRNA    | JF698683.1                    | 54°C                             | GGCCGTTCTTAGTTGGTGGA<br>TTGCTCAATCTCGTGTGGCT    |

**Table 2: Predicted MyoD-binding miRNAs and their expression pattern**

| Predicted miRNAs | Expression pattern                       | Method               |
|------------------|------------------------------------------|----------------------|
| miR-23b          | heart, liver, intestine, skeletal muscle | RT-PCR               |
| miR-122          | liver                                    | Referance and RT-PCR |
| miR-138          | liver, brain, heart                      | RT-PCR               |
| miR-142a-5p      | liver, intestine                         | RT-PCR               |
| miR-190          | skeletal muscle, pancreas, intestine     | RT-PCR               |
| miR-190b         | skeletal muscle, pancreas, intestine     | RT-PCR               |
| miR-203b         | skeletal muscle, heart, intestine,       | RT-PCR               |
| miR-375          | pancreas                                 | Referance and RT-PCR |
| miR-722          | eye                                      | Referance and RT-PCR |
